# Supplementary material for: Hypoxia and hypoxia inducible factor-1α are required for normal endometrial repair during menstruation
Source: PubMed Central journal article supplement (PMC5780386; doi:10.1038/s41467-017-02375-6), 2018-01-23
Supplement: 41467_2017_2375_MOESM1_ESM.pdf [file 41467_2017_2375_MOESM1_ESM.pdf]

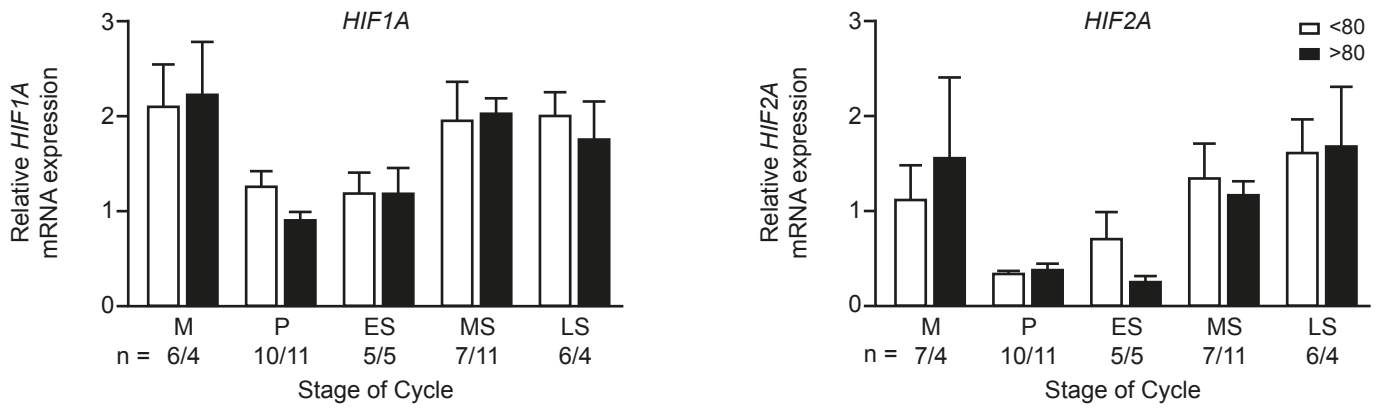

**Supplementary Figure 1.** *HIF-1 $\alpha$*  and *HIF-2 $\alpha$*  mRNA concentrations across the menstrual cycle in endometrium from women with normal menstrual bleeding (NMB, <80ml) and heavy menstrual bleeding (HMB, >80ml). M menstrual, P proliferative, ES early secretory, MS mid secretory, LS late secretory. Error bars = SEM.

| Score | Morphological Features                                                                                                                              | Representative H & E                                                                 |
|-------|-----------------------------------------------------------------------------------------------------------------------------------------------------|--------------------------------------------------------------------------------------|
| 1     | Decidualized tissue. Expansion of stromal compartment, presence of decidual cells. Glands pushed towards the myometrium.                            | 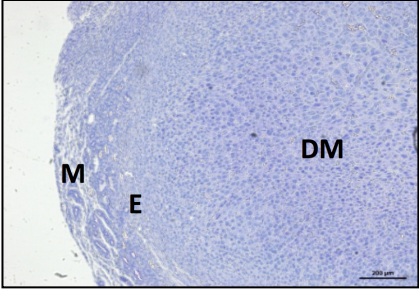   |
| 2     | Early breakdown. Some loss of structural integrity between decidual cells. Most decidua still intact.                                               |    |
| 3     | Complete breakdown. Complete tissue destruction in decidual zone. No intact decidual tissue. Some sloughing of the endometrium from the myometrium. |   |
| 4     | Early repair. Beginnings of reepithelialization. Dissociation of necrotic tissue from the myometrium.                                               |  |
| 5     | Complete repair. Stromal restoration, complete reepithelialization. Small amount of luminal debris.                                                 |  |

**Supplementary Figure 2. Histological breakdown/repair grading system.** Histological endometrial breakdown/repair scoring system, adapted from<sup>1</sup> with representative uterine sections displaying histological features of scores 1-5. M myometrium, E endometrium, DM decidualized mass, SE surface epithelium (Scale bar 200um).

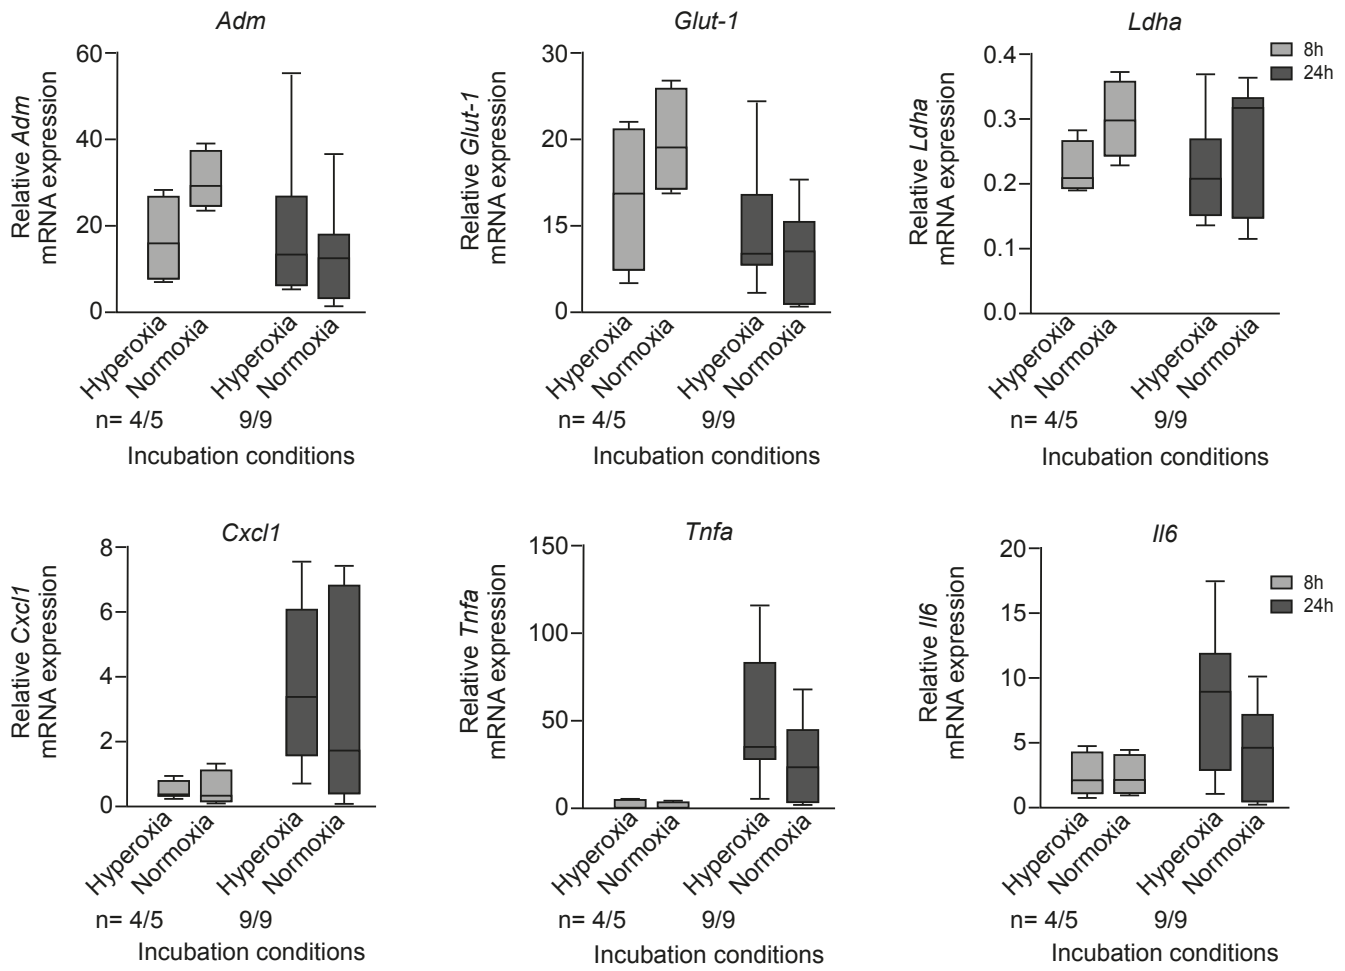

**Supplementary Figure 3.** *Adm*, *Glut-1*, *Ldha* (HIF regulated) and *Cxcr1*, *Tnfa*, *Il6* (inflammatory mediators) at T8 and T24 in mice with non-hypoxic menstruation (Hyperoxia, 75% O<sub>2</sub>) and hypoxic menstruation (Normoxia, 21% O<sub>2</sub>). Box and whisker plots: box represents upper and lower quartiles with horizontal line representing the median, whiskers represent minimum and maximum values.

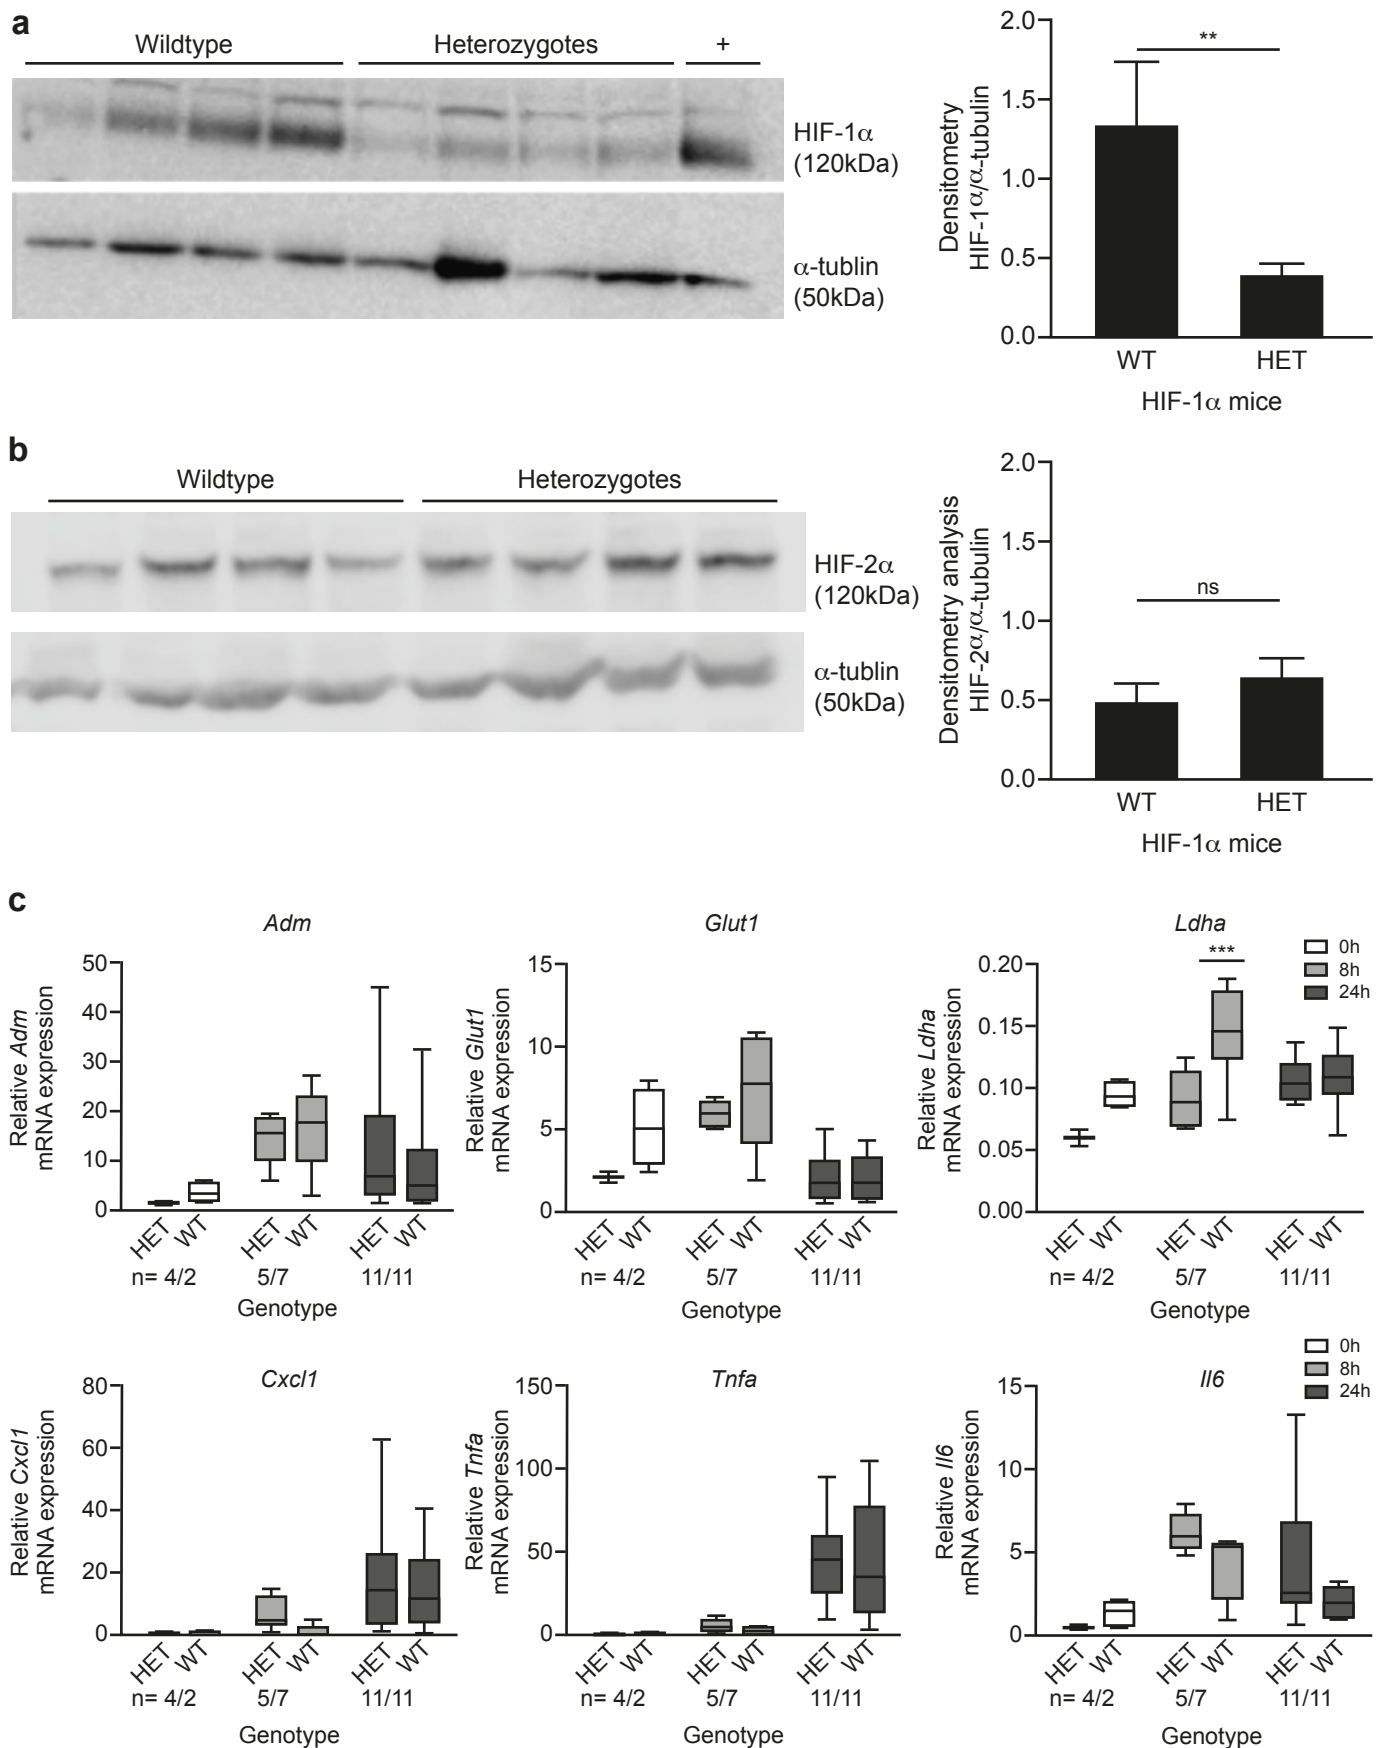

**Supplementary Figure 4. (a)** HIF-1 $\alpha$  protein in endometrial tissue from wild type (WT, HIF-1 $\alpha$ +/+) and HIF-1 $\alpha$  heterozygous (HET, HIF-1 $\alpha$ +/-) mice at T8. + = positive control, protein extract from uterine tissue incubated in hypoxia for 8h. Error bars = SEM. **(b)** HIF-2 $\alpha$  protein in endometrial tissue from wild type (WT, HIF-1 $\alpha$ +/+) and HIF-1 $\alpha$  heterozygous (HET, HIF-1 $\alpha$ +/-) mice at T8. Error bars = SEM. **(c)** *Adm*, *Glut-1*, *Ldha* (HIF-1 targets) and *Cxcr1*, *Tnfa*, *Il6* (inflammatory mediators) at T0, T8 and T24 in HIF-1 $\alpha$  heterozygous (HET HIF-1 $\alpha$ +/-) and wildtype (WT; HIF-1 $\alpha$ +/+) mice. Box and whisker plots: box represents upper and lower quartiles with horizontal line representing the median, whiskers represent minimum and maximum values. \*\*P<0.01, \*\*\*P<0.001. (Two-way ANOVA with Sidak's multiple comparisons test).

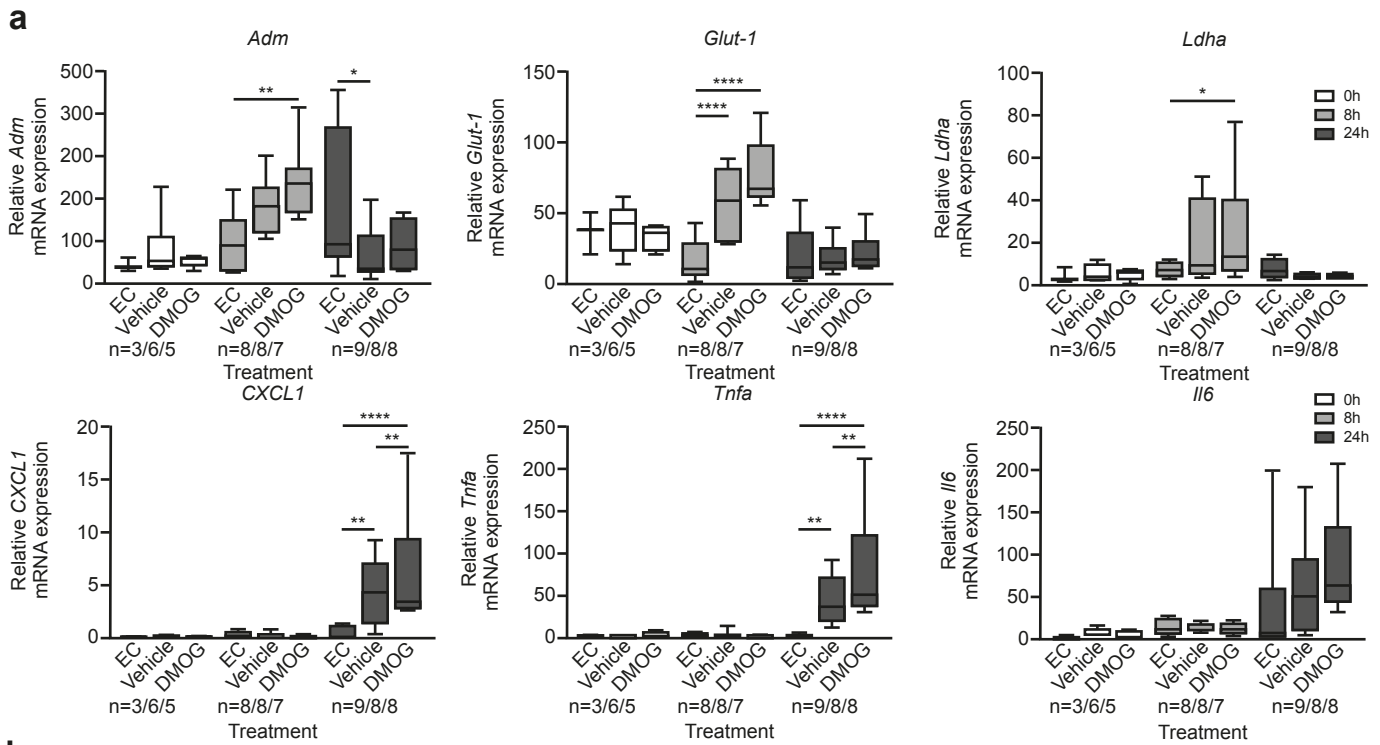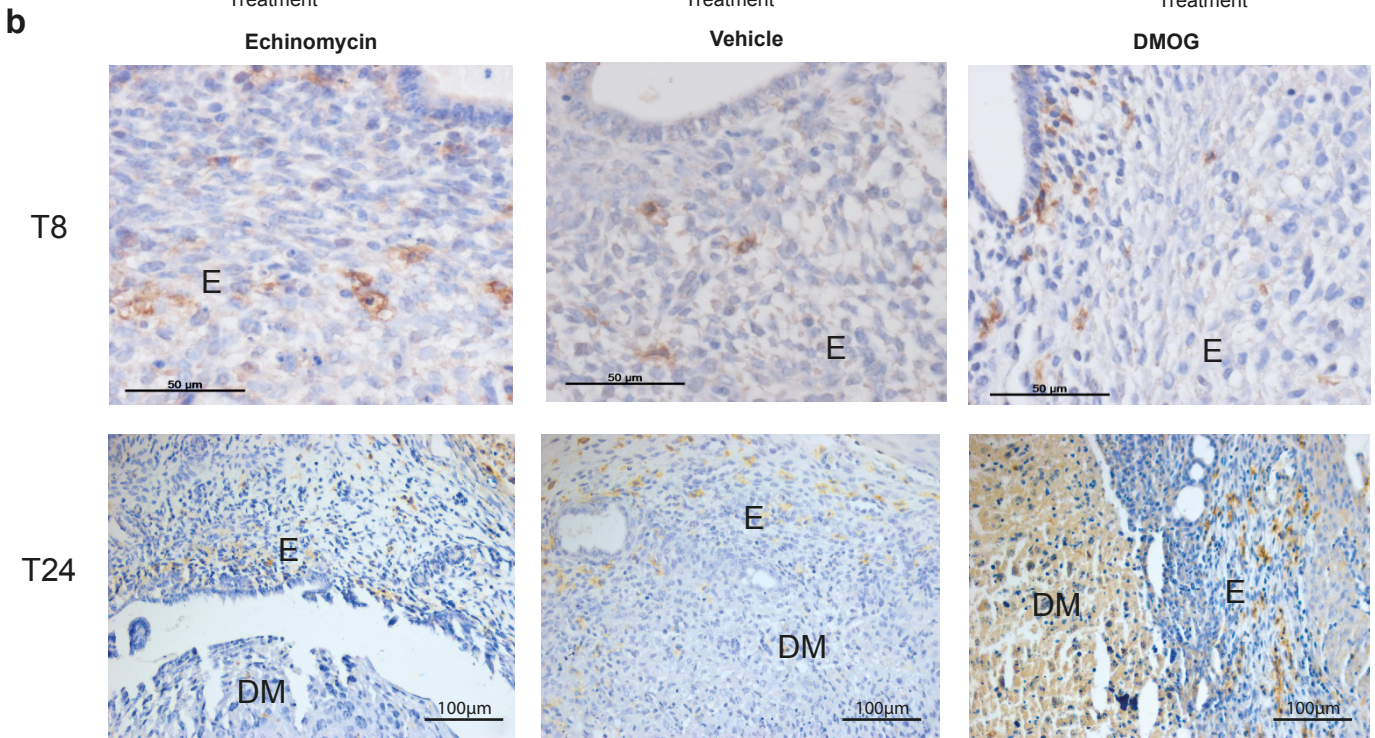

**Supplementary Figure 5. (a)** *Adm*, *Glut-1*, *Ldha* (HIF-1 targets) and *Cxcr1*, *Tnfa*, *Il6* (inflammatory mediators) at T0, T8 and T24 in mice treated with echinomycin (EC), vehicle or dimethylxallylglycine (DMOG). Box represents upper and lower quartiles with horizontal line representing the median, whiskers represent minimum and maximum values. \* $P < 0.05$ , \*\* $P < 0.01$ , \*\*\* $P < 0.0001$ . (Two way ANOVA with Tukey's multiple comparison's test) **(b)** F4/80 staining in endometrium collected 8h (T8) and 24h (T24) following progesterone withdrawal from mice treated with echinomycin (EC: HIF-1 inhibitor), vehicle or dimethylxallylglycine (DMOG: HIF-1  $\alpha$  stabilizer). E endometrium, DM decidualized mass (Scale bars 50 $\mu$ m upper images and 100 $\mu$ m lower images).

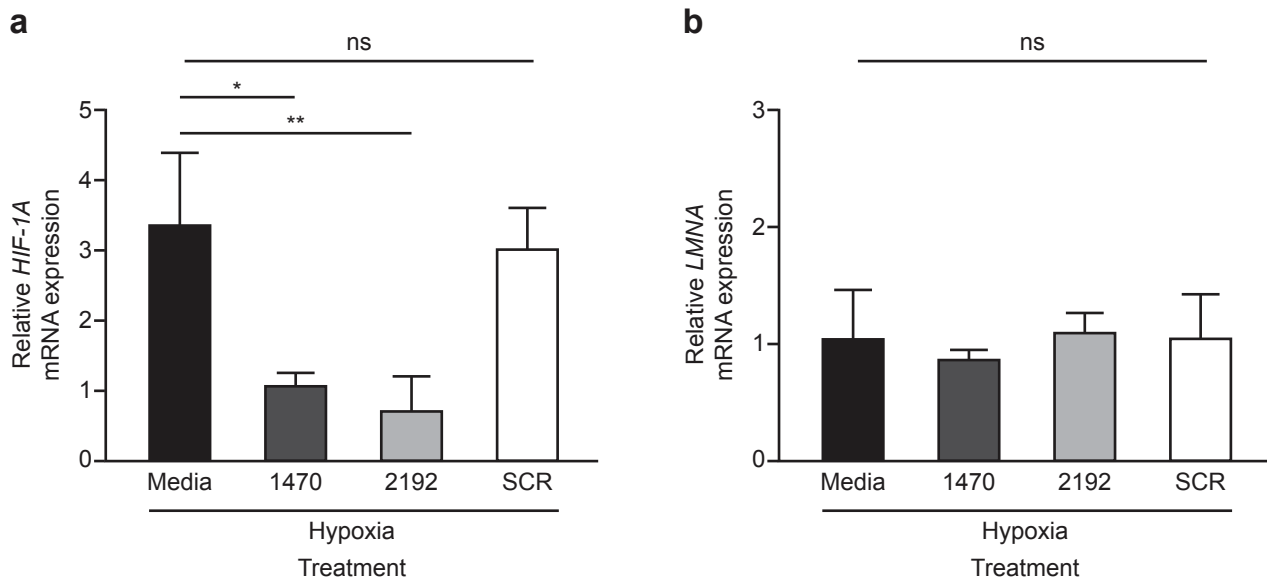

**Supplementary Figure 6. Confirmation of HIF-1 $\alpha$  silencing in endometrial epithelial cells.**

**(a)** *HIF1A* mRNA in untransfected cells and in cells transfected with a scrambled short hairpin sequence (SCR) and two different short hairpin sequences derived from human *HIF1A* mRNA U22431; bp 1470-1489 (1470) and bp 2192-2211(2192), all incubated in hypoxia (0.5% O<sub>2</sub>) for 8h. n=3.

**(b)** *LMNA* mRNA in the same cells to determine sequence specificity of ShRNA constructs.

ns non-significant, \*P<0.05, \*\*P<0.01(ANOVA with Tukey's multiple comparison's test). Error bars = SEM.

**a**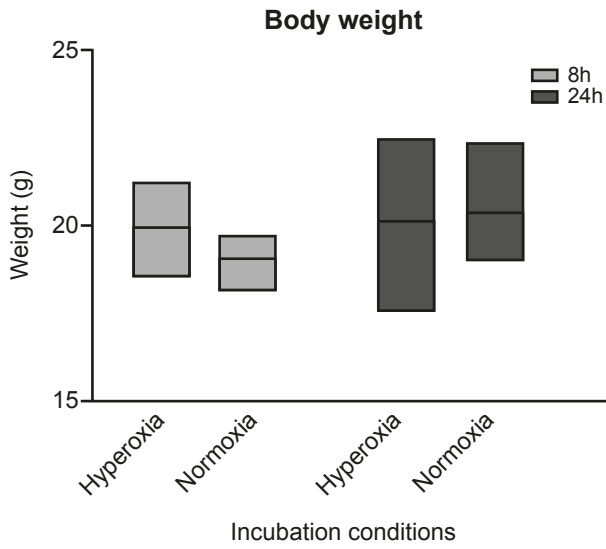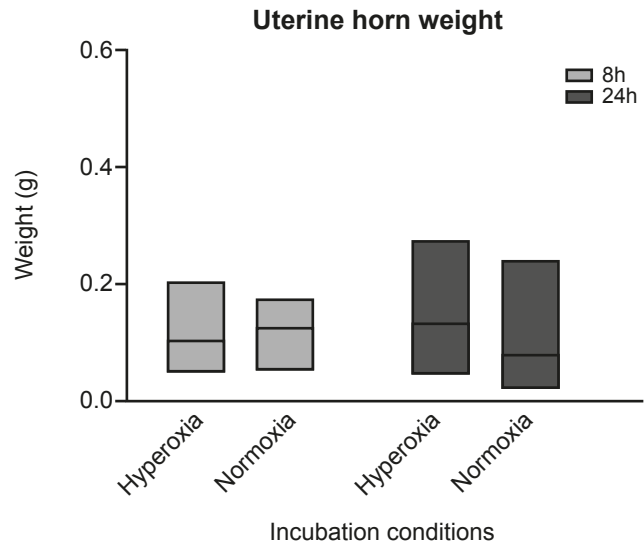**b**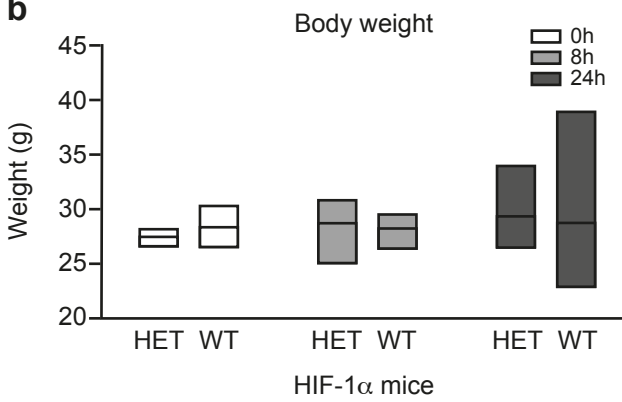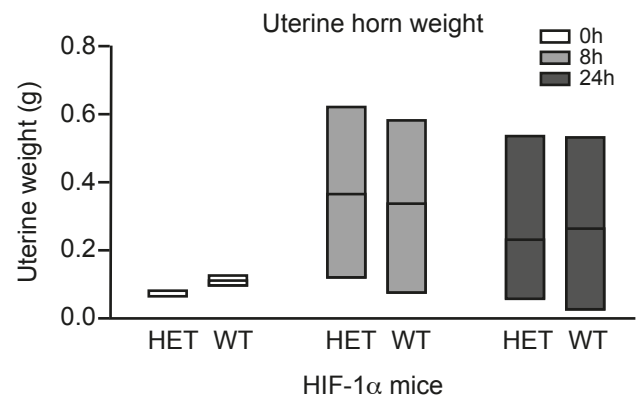**c**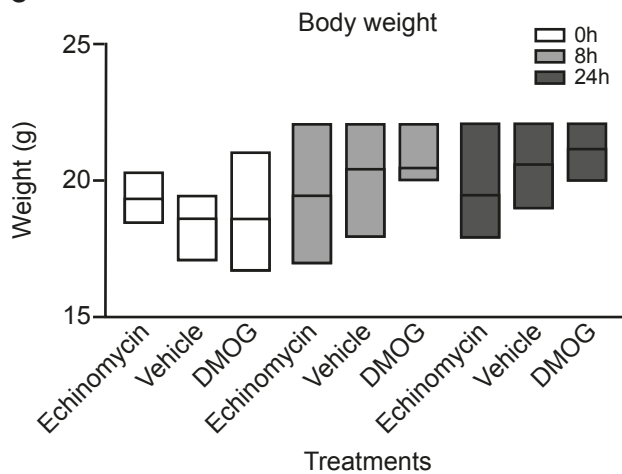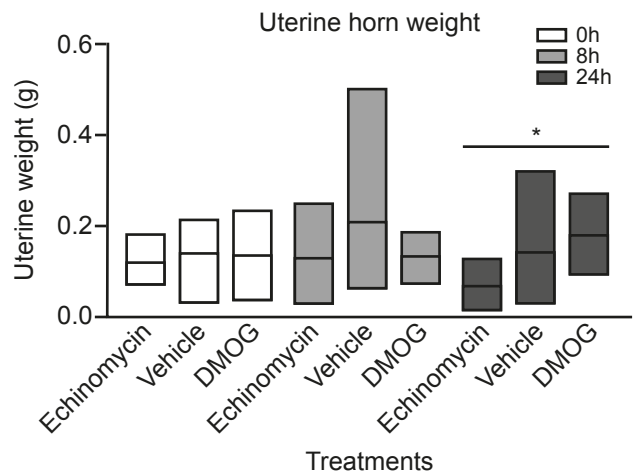

**Supplementary Figure 7. (a)** Mouse body weights and decidualized uterine horn weights at T8 and T24 in mice incubated in hyperoxia (75% O<sub>2</sub>) and normoxia (21% O<sub>2</sub>) at the time of P4 withdrawal. **(b)** HIF-1 $\alpha$  heterozygote (HET HIF-1 $\alpha$ <sup>+/-</sup>) and wildtype (WT; HIF-1 $\alpha$ <sup>+/+</sup>) mouse body weights and decidualized uterine horn weights at T0, T8 and T24. **(c)** Mouse body weights and decidualized uterine horn weights at T0, T8 and T24 in mice treated with echinomycin (EC), vehicle or dimethylxalylglycine (DMOG). \*P<0.05 (Two-way ANOVA with Tukey's multiple comparison's test). Floating bars represent minimum and maximum weights, line represents mean.

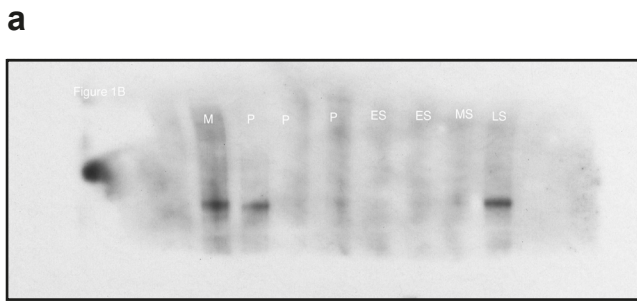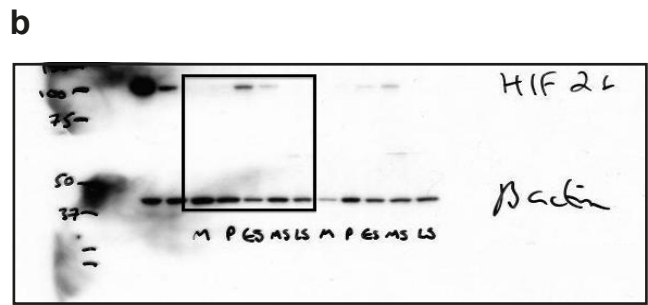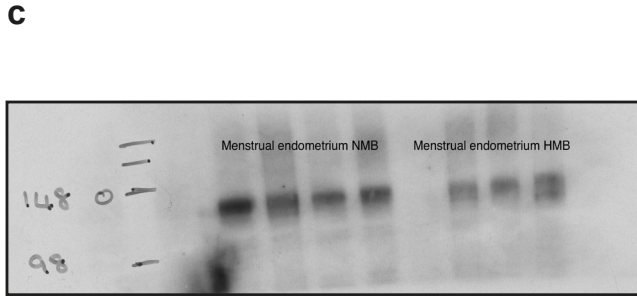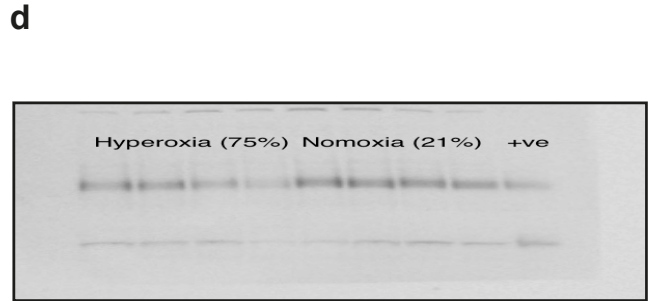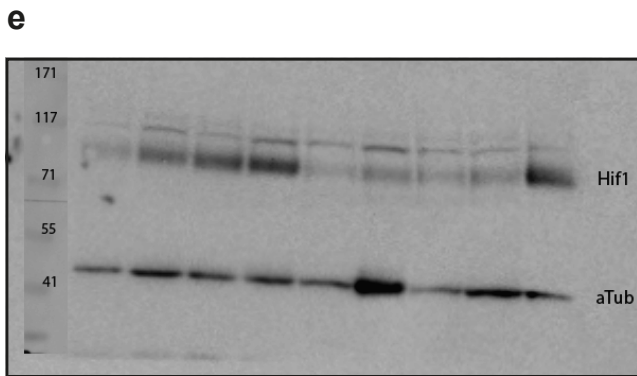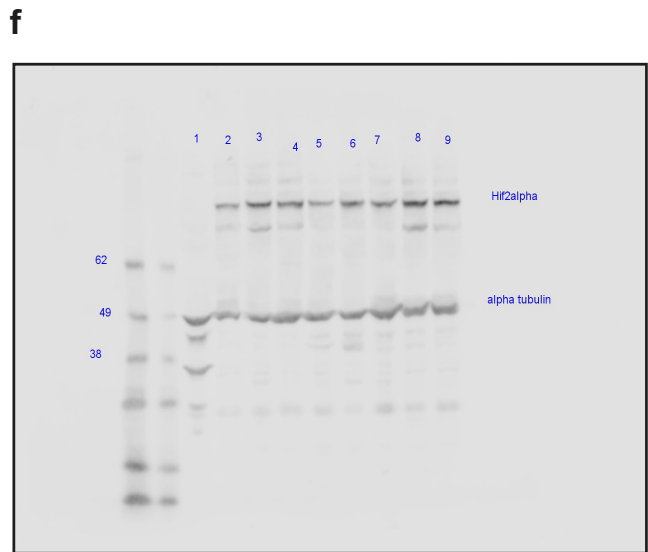

**Supplementary Figure 8. Uncropped scans of Western blots.** (a) Western blot for HIF-1 $\alpha$  in nuclear protein extracts from human endometrial samples taken at different phases of the menstrual cycle (Figure 1b). (b) HIF-2 $\alpha$  Western blot of endometrial nuclear protein extracts from across the menstrual cycle (Figure 1c). (c) HIF-1 $\alpha$  Western blot in menstrual phase endometrium from women with NMB and HMB (Figure 1d). (d) HIF-1 $\alpha$  Western blot of uterine protein extracts at T8 from mice in 75% O<sub>2</sub> (hyperoxia = non-hypoxic endometrium) versus 21% O<sub>2</sub> (normoxia = hypoxic endometrium) (Figure 3b). (e) HIF-1 $\alpha$  protein in endometrial tissue from wild type and HIF-1 $\alpha$  heterozygous mice at T8 (Supplementary Fig. 4a). (f) HIF-2 $\alpha$  protein in endometrial tissue from wildtype and HIF-1 $\alpha$  heterozygous mice at T8 (Supplementary Fig. 4b).



| Stage of cycle. | Blood loss (mean, ml) | n-number | Estradiol (mean, pmol/litre) | Progesterone (mean, nmol/litre) |
|-----------------|-----------------------|----------|------------------------------|---------------------------------|
| Menstrual       | NMB (32)              | 8        | 196                          | 3.1                             |
|                 | HMB (184)             | 7        | 103                          | 7.4                             |
|                 | No MBL                | 3        | 135                          | 6.66                            |
| Proliferative   | NMB (45)              | 10       | 742                          | 4.4                             |
|                 | HMB (246)             | 11       | 725                          | 6.0                             |
|                 | No MBL                | 3        | 650                          | 4.4                             |
| Early secretory | NMB (42)              | 5        | 600                          | 31.4                            |
|                 | HMB (137)             | 5        | 597                          | 31.0                            |
|                 | No MBL                | 2        | 535                          | 47.4                            |
| Mid secretory   | NMB (34)              | 8        | 436                          | 47.1                            |
|                 | HMB (138)             | 11       | 486                          | 57.9                            |
|                 | No MBL                | 1        | 478                          | 52.7                            |
| Late secretory  | NMB (39)              | 6        | 183                          | 10.9                            |
|                 | HMB (206)             | 4        | 224                          | 14.3                            |
|                 | No MBL                | 1        | 341                          | 9.2                             |

**Supplementary Table 1. Participant serum hormone levels at time of endometrial biopsy and mean menstrual blood loss (MBL). HMB heavy menstrual bleeding (>80ml), NMB normal menstrual bleeding (<80ml).**

| Gene           | Species | Accession number         | Forward Primer                | Reverse Primer               | UPL no. |
|----------------|---------|--------------------------|-------------------------------|------------------------------|---------|
| HIF-1 $\alpha$ | Human   | ENST00000337138.4        | tttttcaagcagtaggaattg<br>ga   | gtgatgtagtagctgcatgat<br>cg  | 66      |
| HIF-2 $\alpha$ | Human   | NM_001430.3              | aatcagcttctctgcaaacac         | gcttcggactcgttttcaga         | 55      |
| VEGF           | Human   | NM_001171622.1           | cagcacaacaaatgtgaatgc         | ggttcccgaaacctgag            | 12      |
| CXCR4          | Human   | NM_003467.2              | ctgtgagcagaggggtccag          | atgaatgtccacctcgcttt         | 55      |
| Vegf           | Mouse   | ENSMUST00000071<br>648.5 | ttaaacgaacgtacttgcaga<br>tg   | agaggctctggttcccgaaa         | 4       |
| Cxcr4          | Mouse   | NM_009911.3              | tggaaccgatcagtgtagt           | gggcaggaagatcctattga         | 38      |
| Adm            | Mouse   | NM_009627.1              | ttcgcagttccgaaagaagt          | agcgagtcccgtagggtag          | 42      |
| Glut1          | Mouse   | NM_011400.3              | ggaccctgcacctcattg            | gccacgatgctcagatagg          | 20      |
| Ldha           | Mouse   | NM_010699.2              | ggcactgacgcagacaag            | tgatcacctcgtaggcactg         | 12      |
| Cxcr1          | Mouse   | NM_008176.3              | actccaacacagcaccatga          | tggctcgcaggcactgac           | 49      |
| Tnf $\alpha$   | Mouse   | NM_013693.2              | ctgtagcccacgtcgtagc           | ttgagatccatgccgttg           | 25      |
| Il6            | Mouse   | NM_031168.1              | gctaccaaactggatataatc<br>agga | ccaggtagctatggtactcca<br>gaa | 6       |
| Actb           | Mouse   | ENSMUST00000100<br>497.4 | ctaaggccaaccgtgaaaag          | accagaggcatacagggaca         | 64      |
| Rpl13          | Mouse   | NM_009438.5              | tccctgctgctctcaagg            | gccccaggttaagcaaactt         | 41      |

**Supplementary Table 2.** PCR Primer details

## Supplementary References

---

Kaitu'u-Lino, T. J., Morison, N. B. & Salamonsen, L. A. Neutrophil depletion retards endometrial repair in a mouse model. *Cell Tissue Res.* **328**, 197-206, doi:10.1007/s00441-006-0358-2 (2007).
